# Supplementary material
Source: PubMed Central journal article supplement (PMC5382979)
Supplement: NIHMS851985-supplement-1.pdf [file NIHMS851985-supplement-1.pdf]

Figure S1.

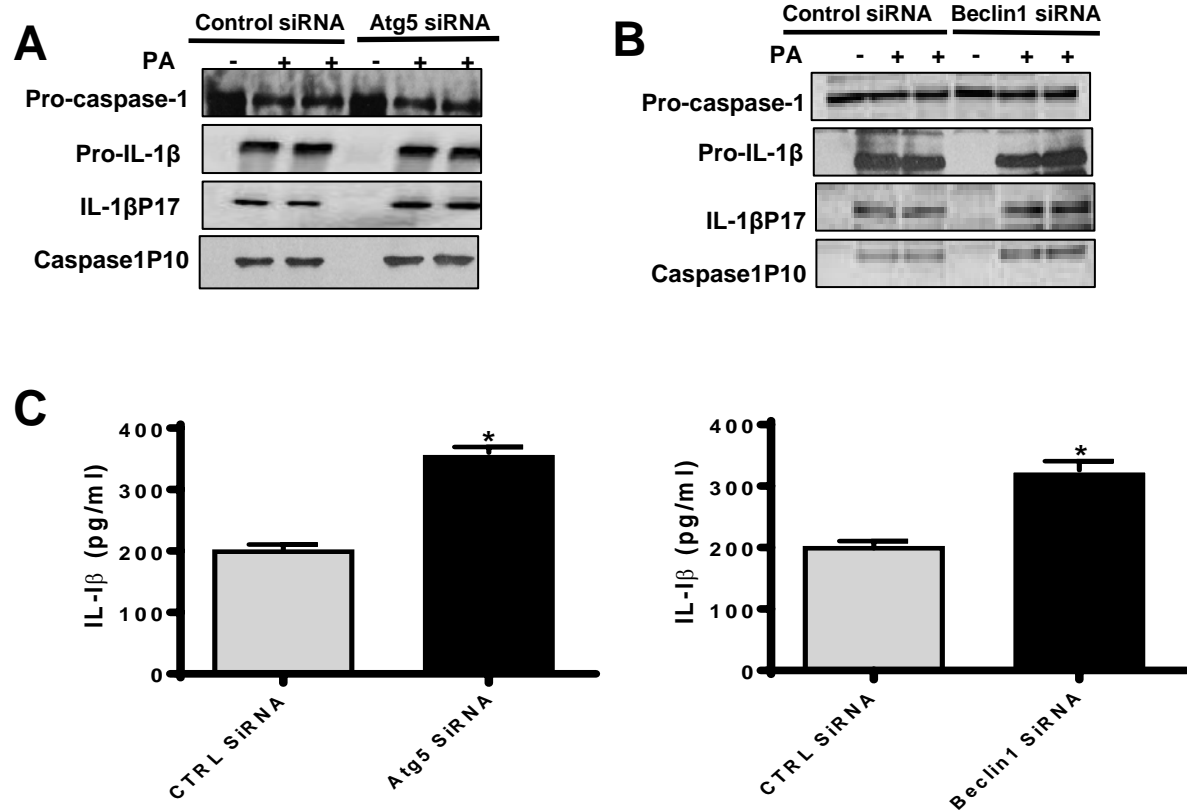

**FIGURE S1.** Depletion of Atg5 or Beclin1 by siRNA leads to activation of inflammasome upon *P. aeruginosa* infection. (A-B) BMDM were isolated from WT mice, then transfected with control siRNA, Atg5 siRNA or Beclin1 siRNA. Then the cells were prestimulated with LPS for 5 hours and infected with PAO1 at MOI of 10:1 for 4 hours. Cell lysates and cell culture media were harvested for western blotting for pro-caspase-1 and pro-IL-1 $\beta$ , caspase-1 (P10) and IL-1 $\beta$  (P17). (C) Secreted IL-1 $\beta$  in the cell culture media assayed by ELISA. Data shown are from three independent experiments. (\* $P < 0.05$ ;  $n = 3$ , T tests.)

Figure S2.

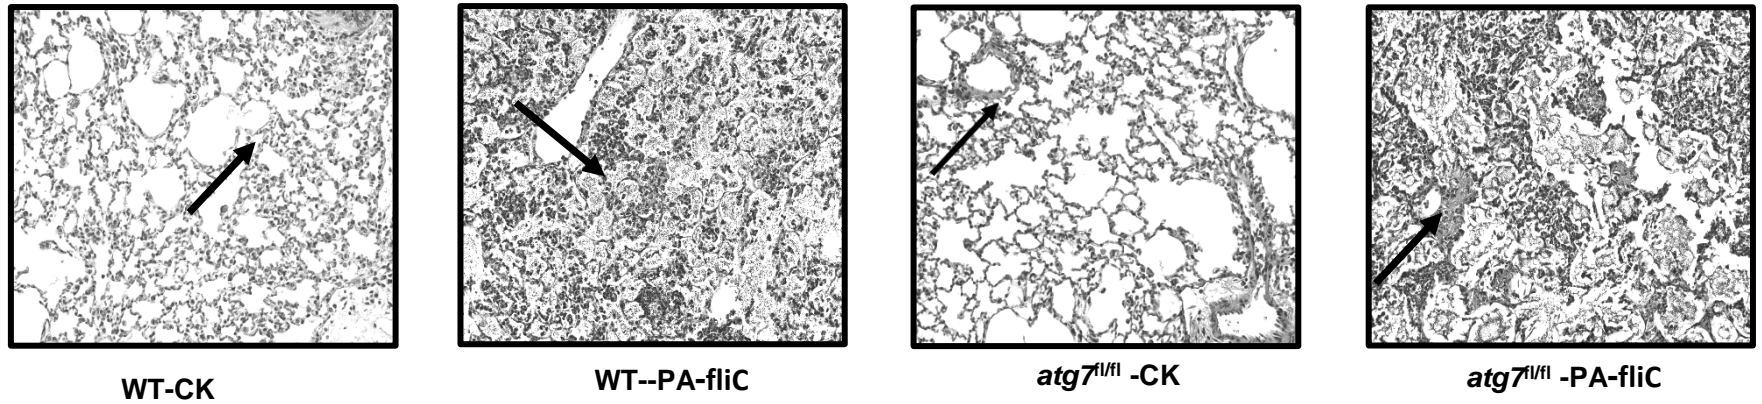

**FIGURE S2.** Representative histological views of lungs of WT mice and *atg7<sup>fl/fl</sup>* mice after 24 hour *i.p.* infection with flagellin knock-out PAK by H&E staining (Inset shows the enlarged view). Data are shown as mean  $\pm$  SEM of three independent experiments (\* $P < 0.05$ ;  $n = 3$ , T tests.)
